# Supplementary material for: A Pan-cancer single-cell analysis reveals the effect of PD-1 blockades on tumor angiogenesis by inhibiting the endothelial CXCL12-CXCR4 axis
Source: Research Square preprint supplement (doi:10.21203/rs.3.rs-7275459/v1), 2025-08-07
Supplement: Supplementary file 1 [file 57deab63d622fab94449c21b.docx]

**Table.S1 Dataset information**

| cancer type | access | sample | tumor sample | normal adjacent tissue sample | Untreated sample | treated sample |
| --- | --- | --- | --- | --- | --- | --- |
| bladder cancer | GSE130001 GSE146137 | 4 | 4 | 0 | 4 | 0 |
| basal cell carcinoma | GSE123813 | 41 | 12 | 29 | 21 | 20 |
| colorectal cancer | GSE205506 | 28 | 19 | 9 | 10 | 18 |
| gastric cancer | GSE183904 | 16 | 8 | 8 | 16 | 0 |
| ovarian cancer | GSE184880 | 12 | 7 | 5 | 12 | 0 |
| head and neck seuqmous cell carcinoma | GSE195832 | 8 | 8 | 0 | 4 | 4 |
| melanoma | GSE215121 | 11 | 11 | 0 | 10 | 1 |
| non-small cell lung cancer | [1] | 35 | 12 | 23 | 8 | 27 |
| Prostate cancer | GSE181294 | 8 | 4 | 4 | 8 | 0 |
| Renal cell carcinoma | [2] | 8 | 8 | 0 | 3 | 5 |

[1] Hui Z, Zhang J, Ren Y, Li X, Yan C, Yu W, Wang T, Xiao S, Chen Y, Zhang R, Wei F, You J, Ren X. Single-cell profiling of immune cells after neoadjuvant pembrolizumab and chemotherapy in IIIA non-small cell lung cancer (NSCLC). Cell Death Dis. 2022 Jul 13;13(7):607. doi: 10.1038/s41419-022-05057-4. PMID: 35831283; PMCID: PMC9279493.

[2] Bi K, He MX, Bakouny Z, Kanodia A, Napolitano S, Wu J, Grimaldi G, Braun DA, Cuoco MS, Mayorga A, DelloStritto L, Bouchard G, Steinharter J, Tewari AK, Vokes NI, Shannon E, Sun M, Park J, Chang SL, McGregor BA, Haq R, Denize T, Signoretti S, Guerriero JL, Vigneau S, Rozenblatt-Rosen O, Rotem A, Regev A, Choueiri TK, Van Allen EM. Tumor and immune reprogramming during immunotherapy in advanced renal cell carcinoma. Cancer Cell. 2021 May 10;39(5):649-661.e5. doi: 10.1016/j.ccell.2021.02.015. Epub 2021 Mar 11. Erratum in: Cancer Cell. 2025 Jun 9;43(6):1177-1179. doi: 10.1016/j.ccell.2025.05.009. PMID: 33711272; PMCID: PMC8115394.
