# Supplementary material for: A Pan-cancer single-cell analysis reveals the effect of PD-1 blockades on tumor angiogenesis by inhibiting the endothelial CXCL12-CXCR4 axis
Source: Research Square preprint supplement (doi:10.21203/rs.3.rs-7275459/v1), 2025-08-07
Supplement: Supplementary file 2 [file aec8e9758ff5ec21f6b98034.docx]

**SUPPLEMENTARY DATA**

**
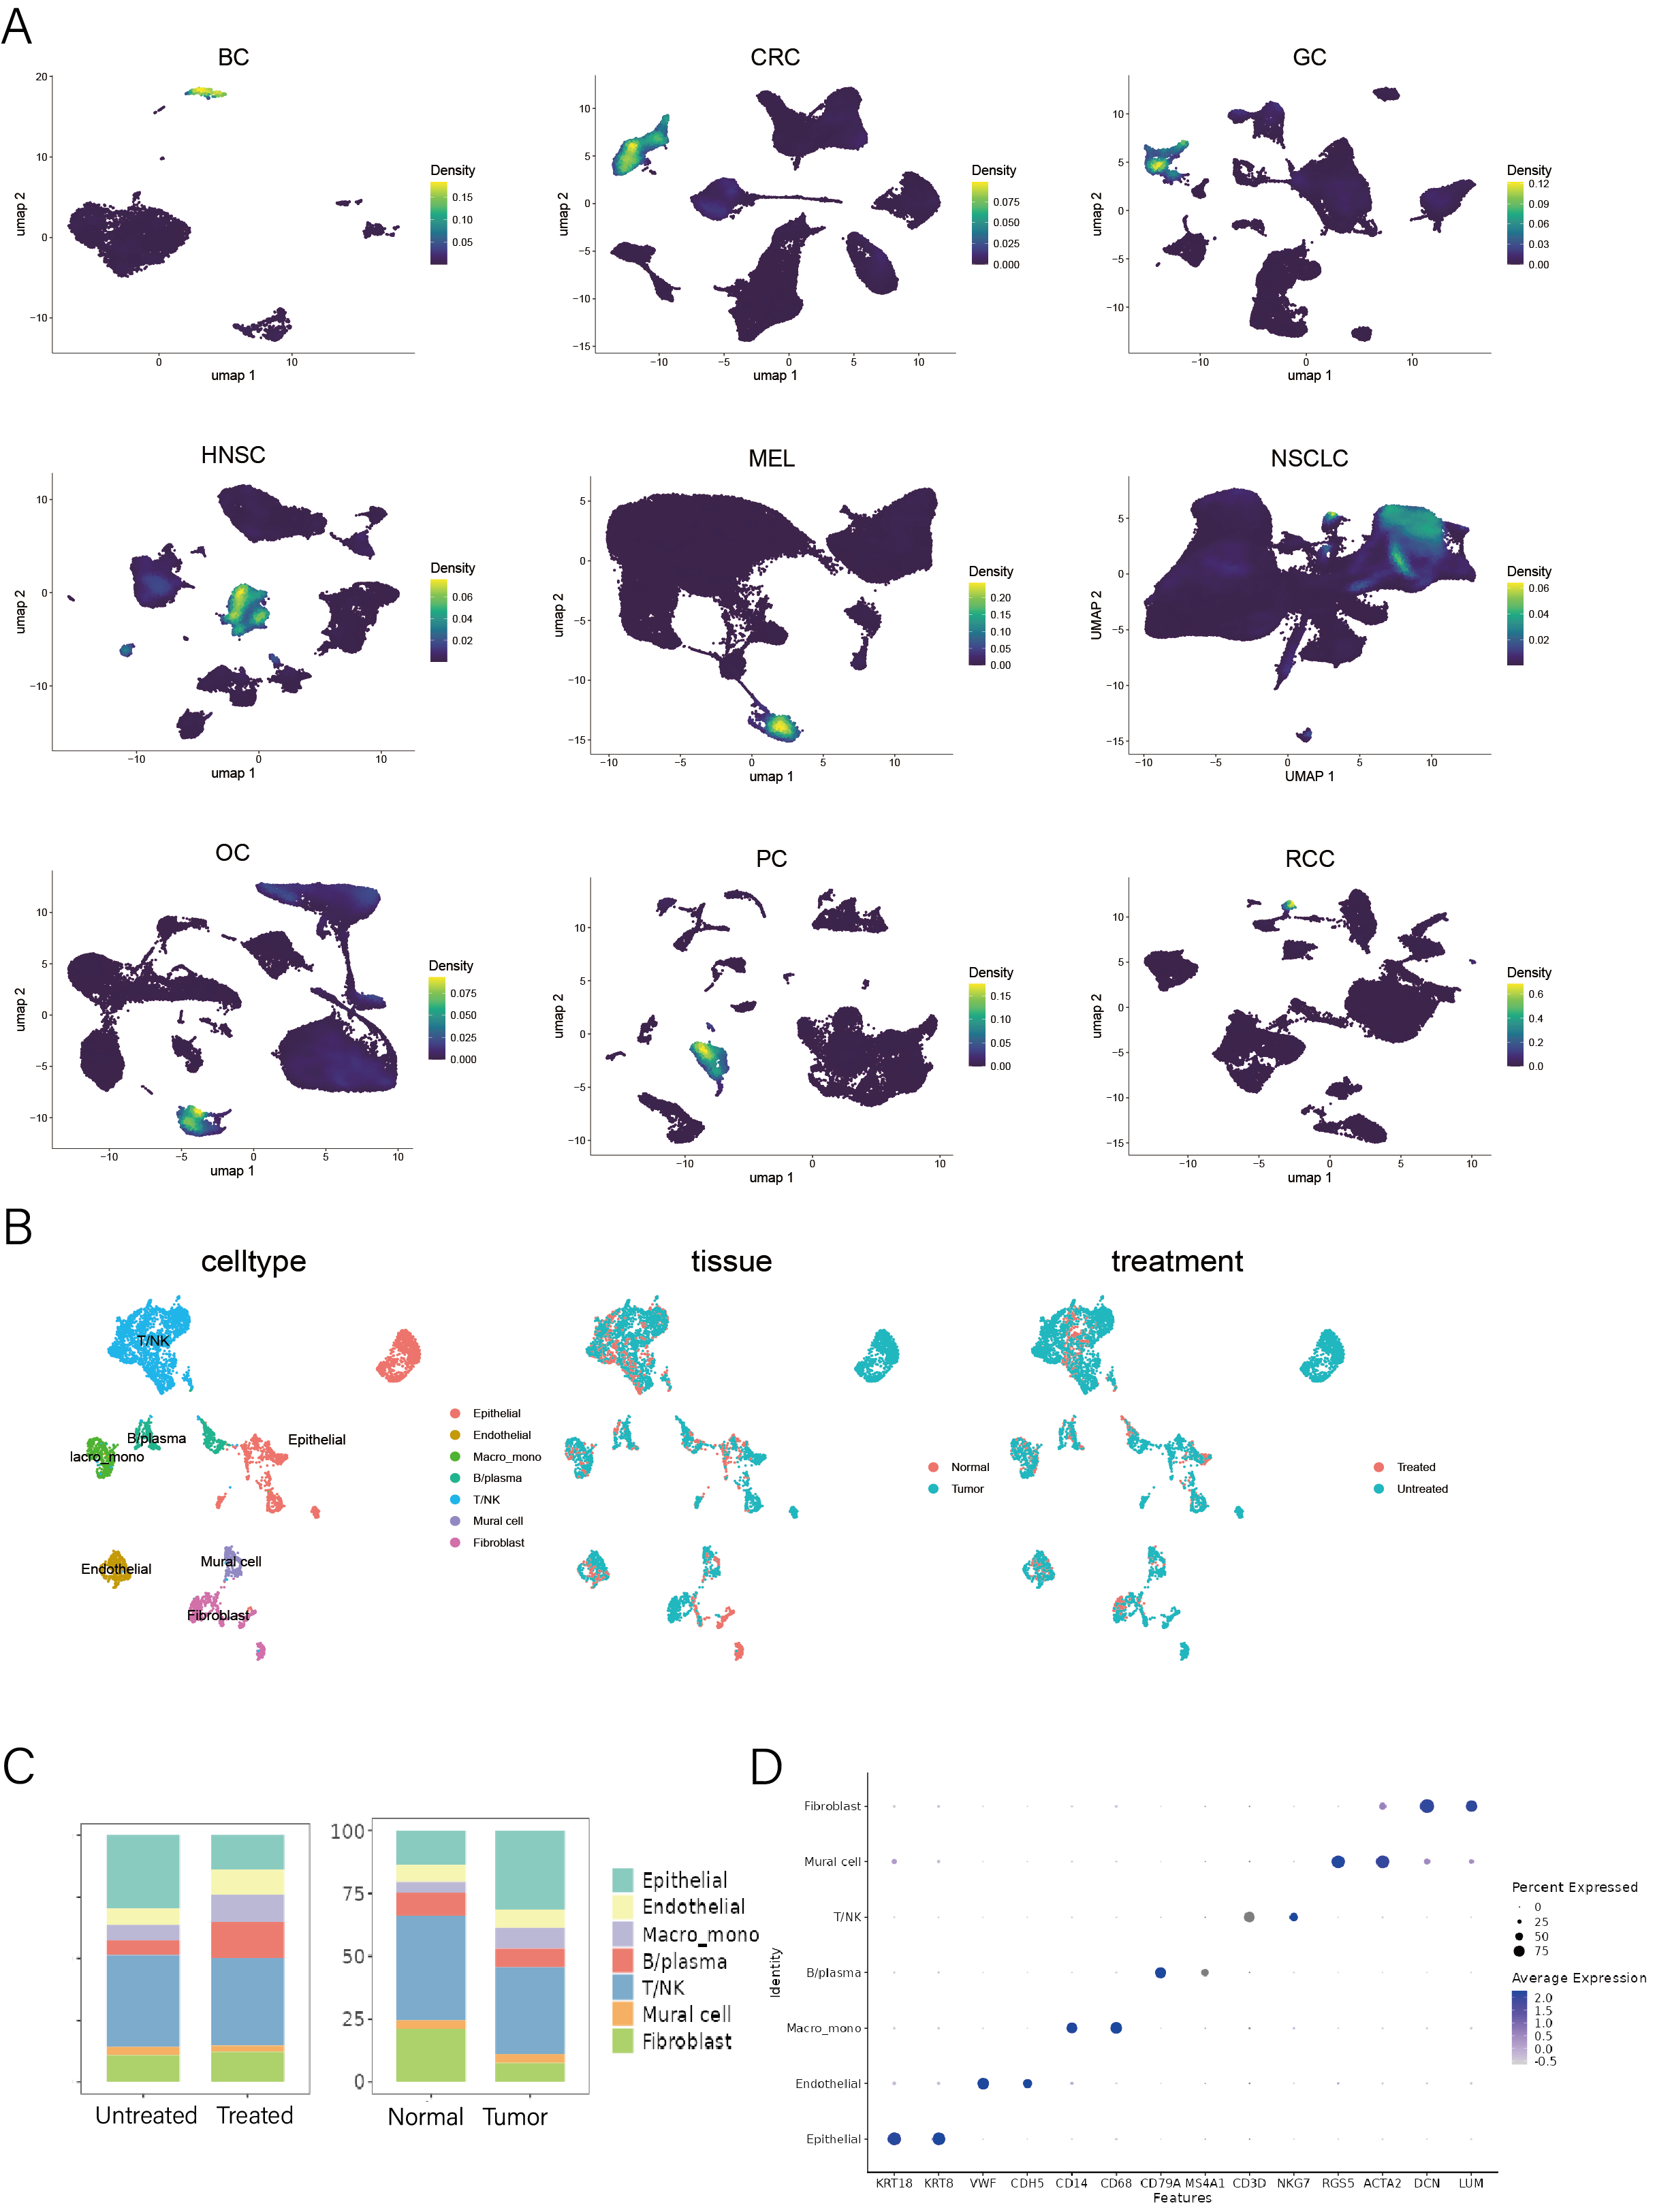
**

**Fig.S1|** Original scRNA-seq datasets and integrated data (downsampled). **A**, UMAP plots showing ECs (annotated by VWF and PECAM1) in each original dataset. **B**, UMAP plots of integrated dataset (1000 cells were selected randomly from each dataset and integrated) labeled by major cell types, tissues, and treatments. **C**. Relative fraction of major cell types in different tissues and treatment statuses. **D**, Dot plot showing marker genes of each major cell types.

**
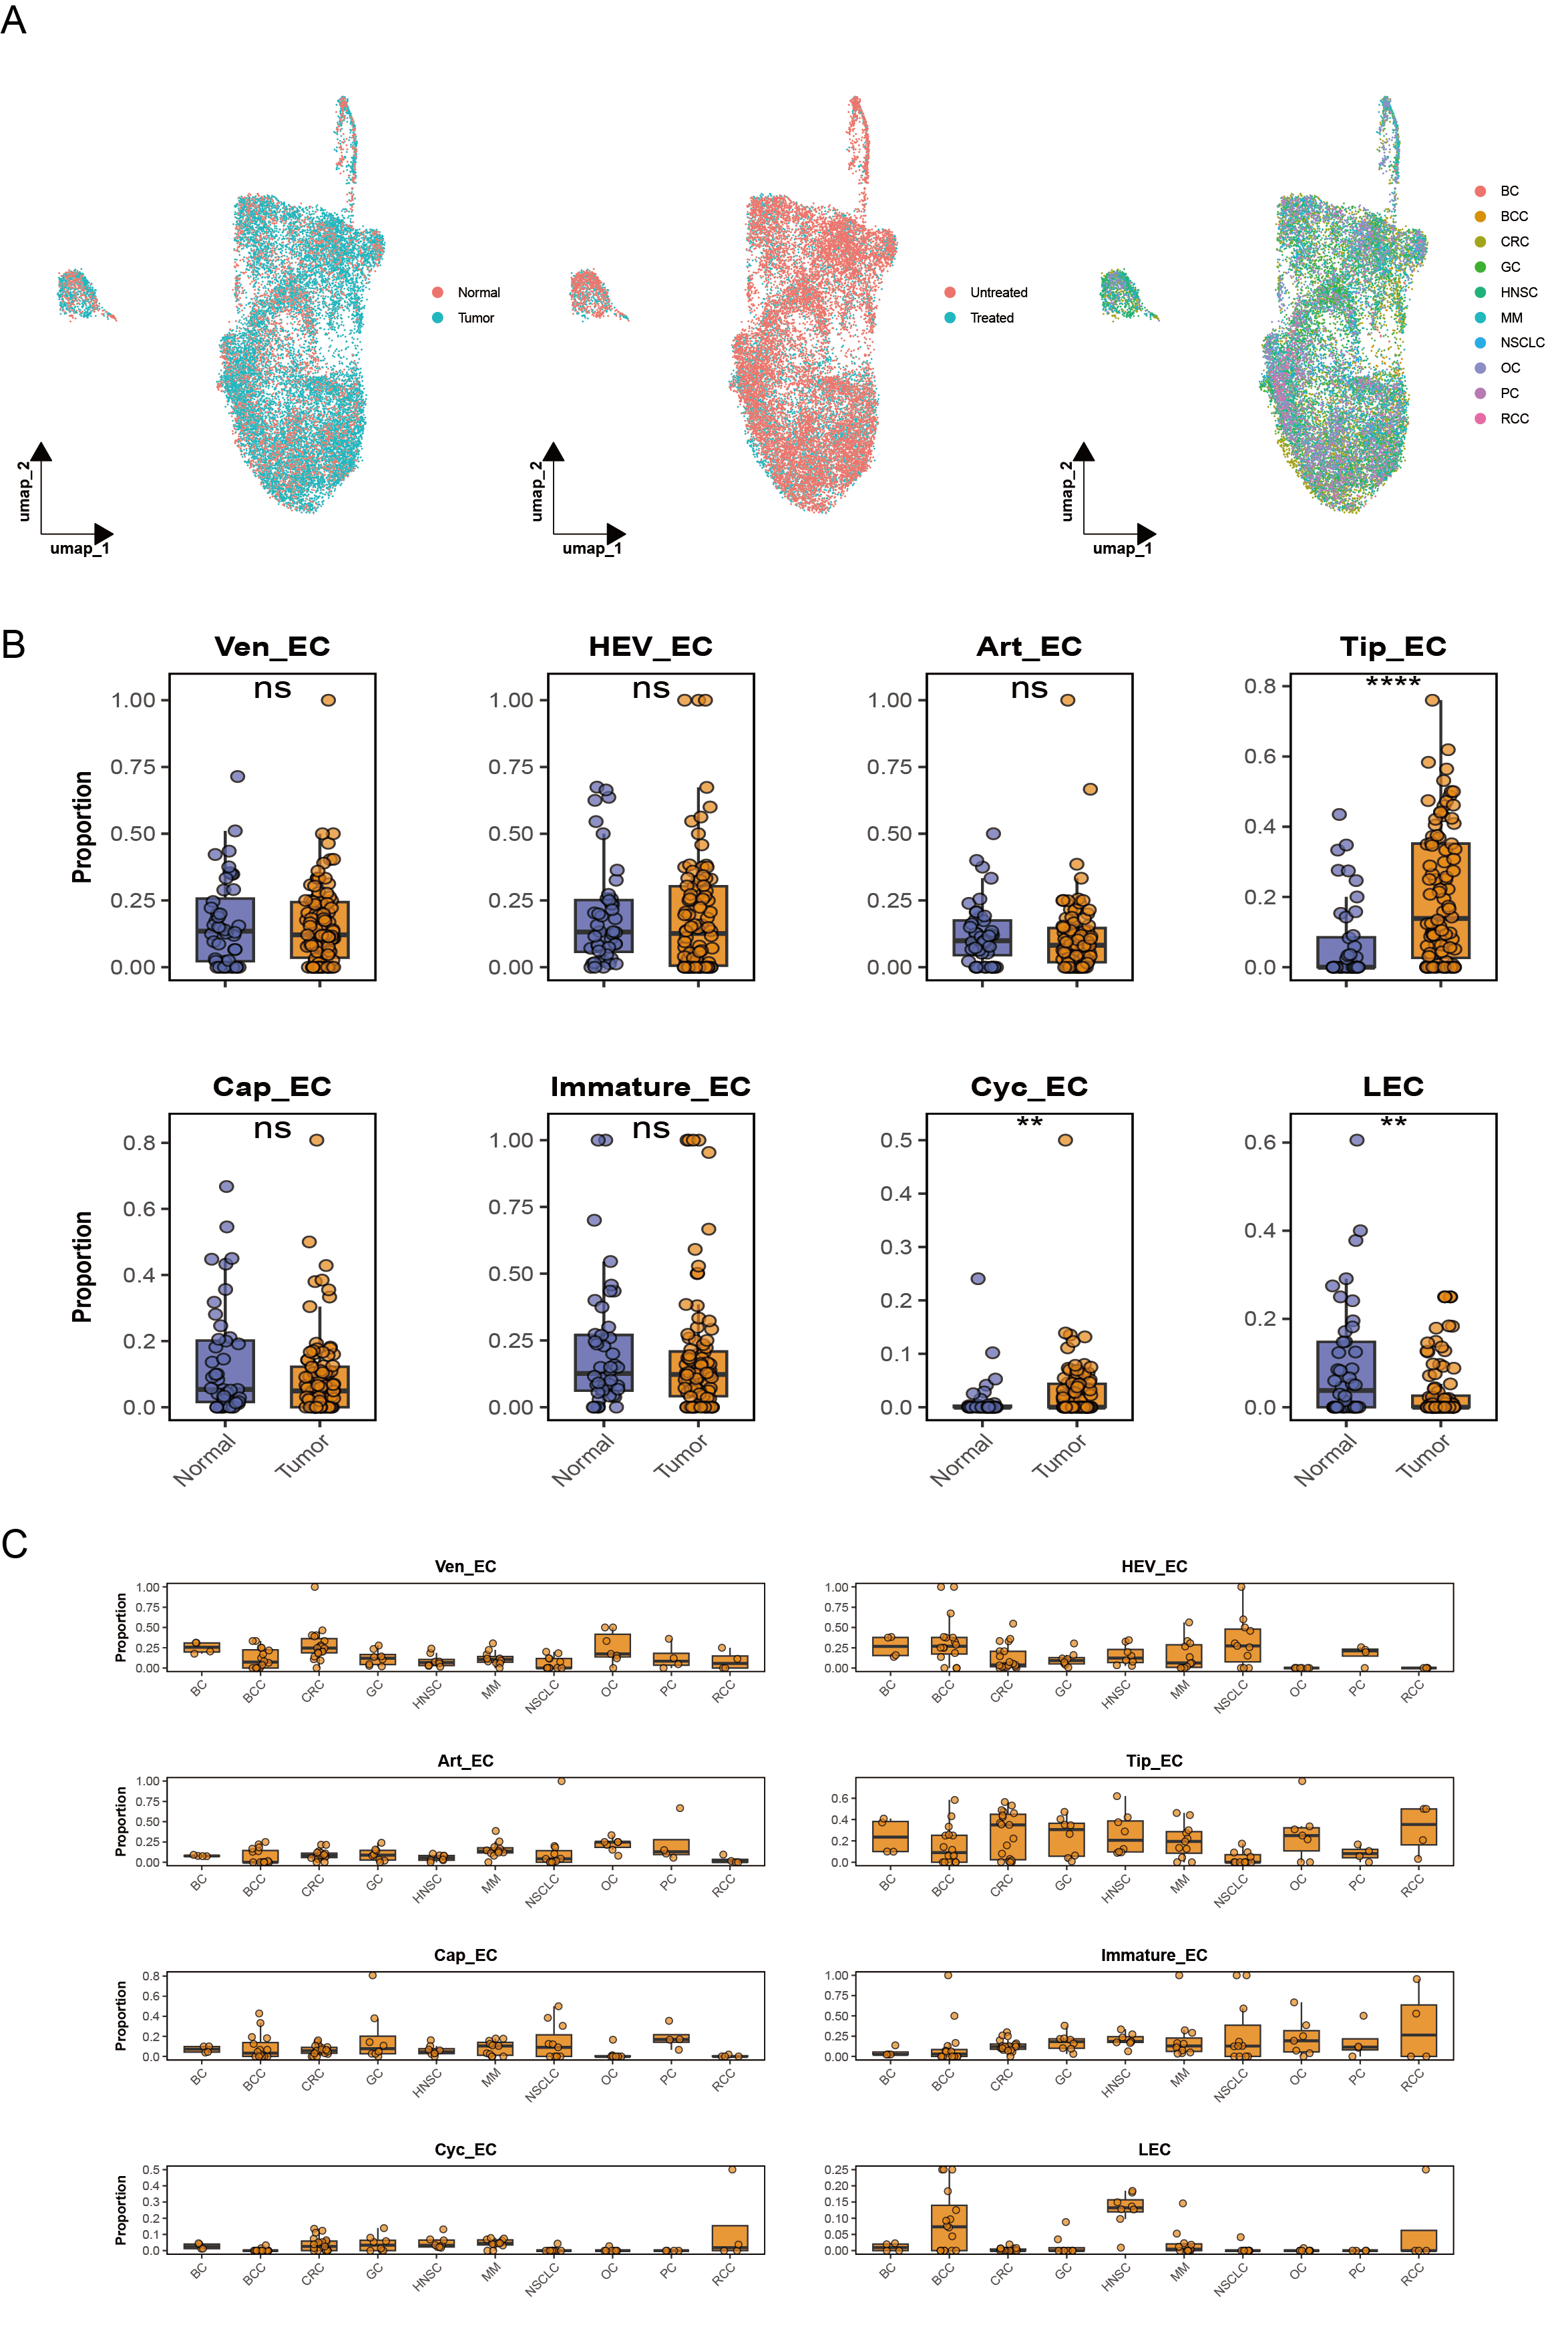
**

**Fig.S2| A,** UMAP plots of the integrated EC dataset labeled by tissues, treatments, and cancer types. **B,** Boxplots showing the fraction of each subcluster in the EC population in different tissues (each dot representing a sample that integrated into the dataset). **C,** Boxplots showing the fraction of each subcluster in the EC population in different malignancies (each dot representing a sample that integrated into the dataset).

**
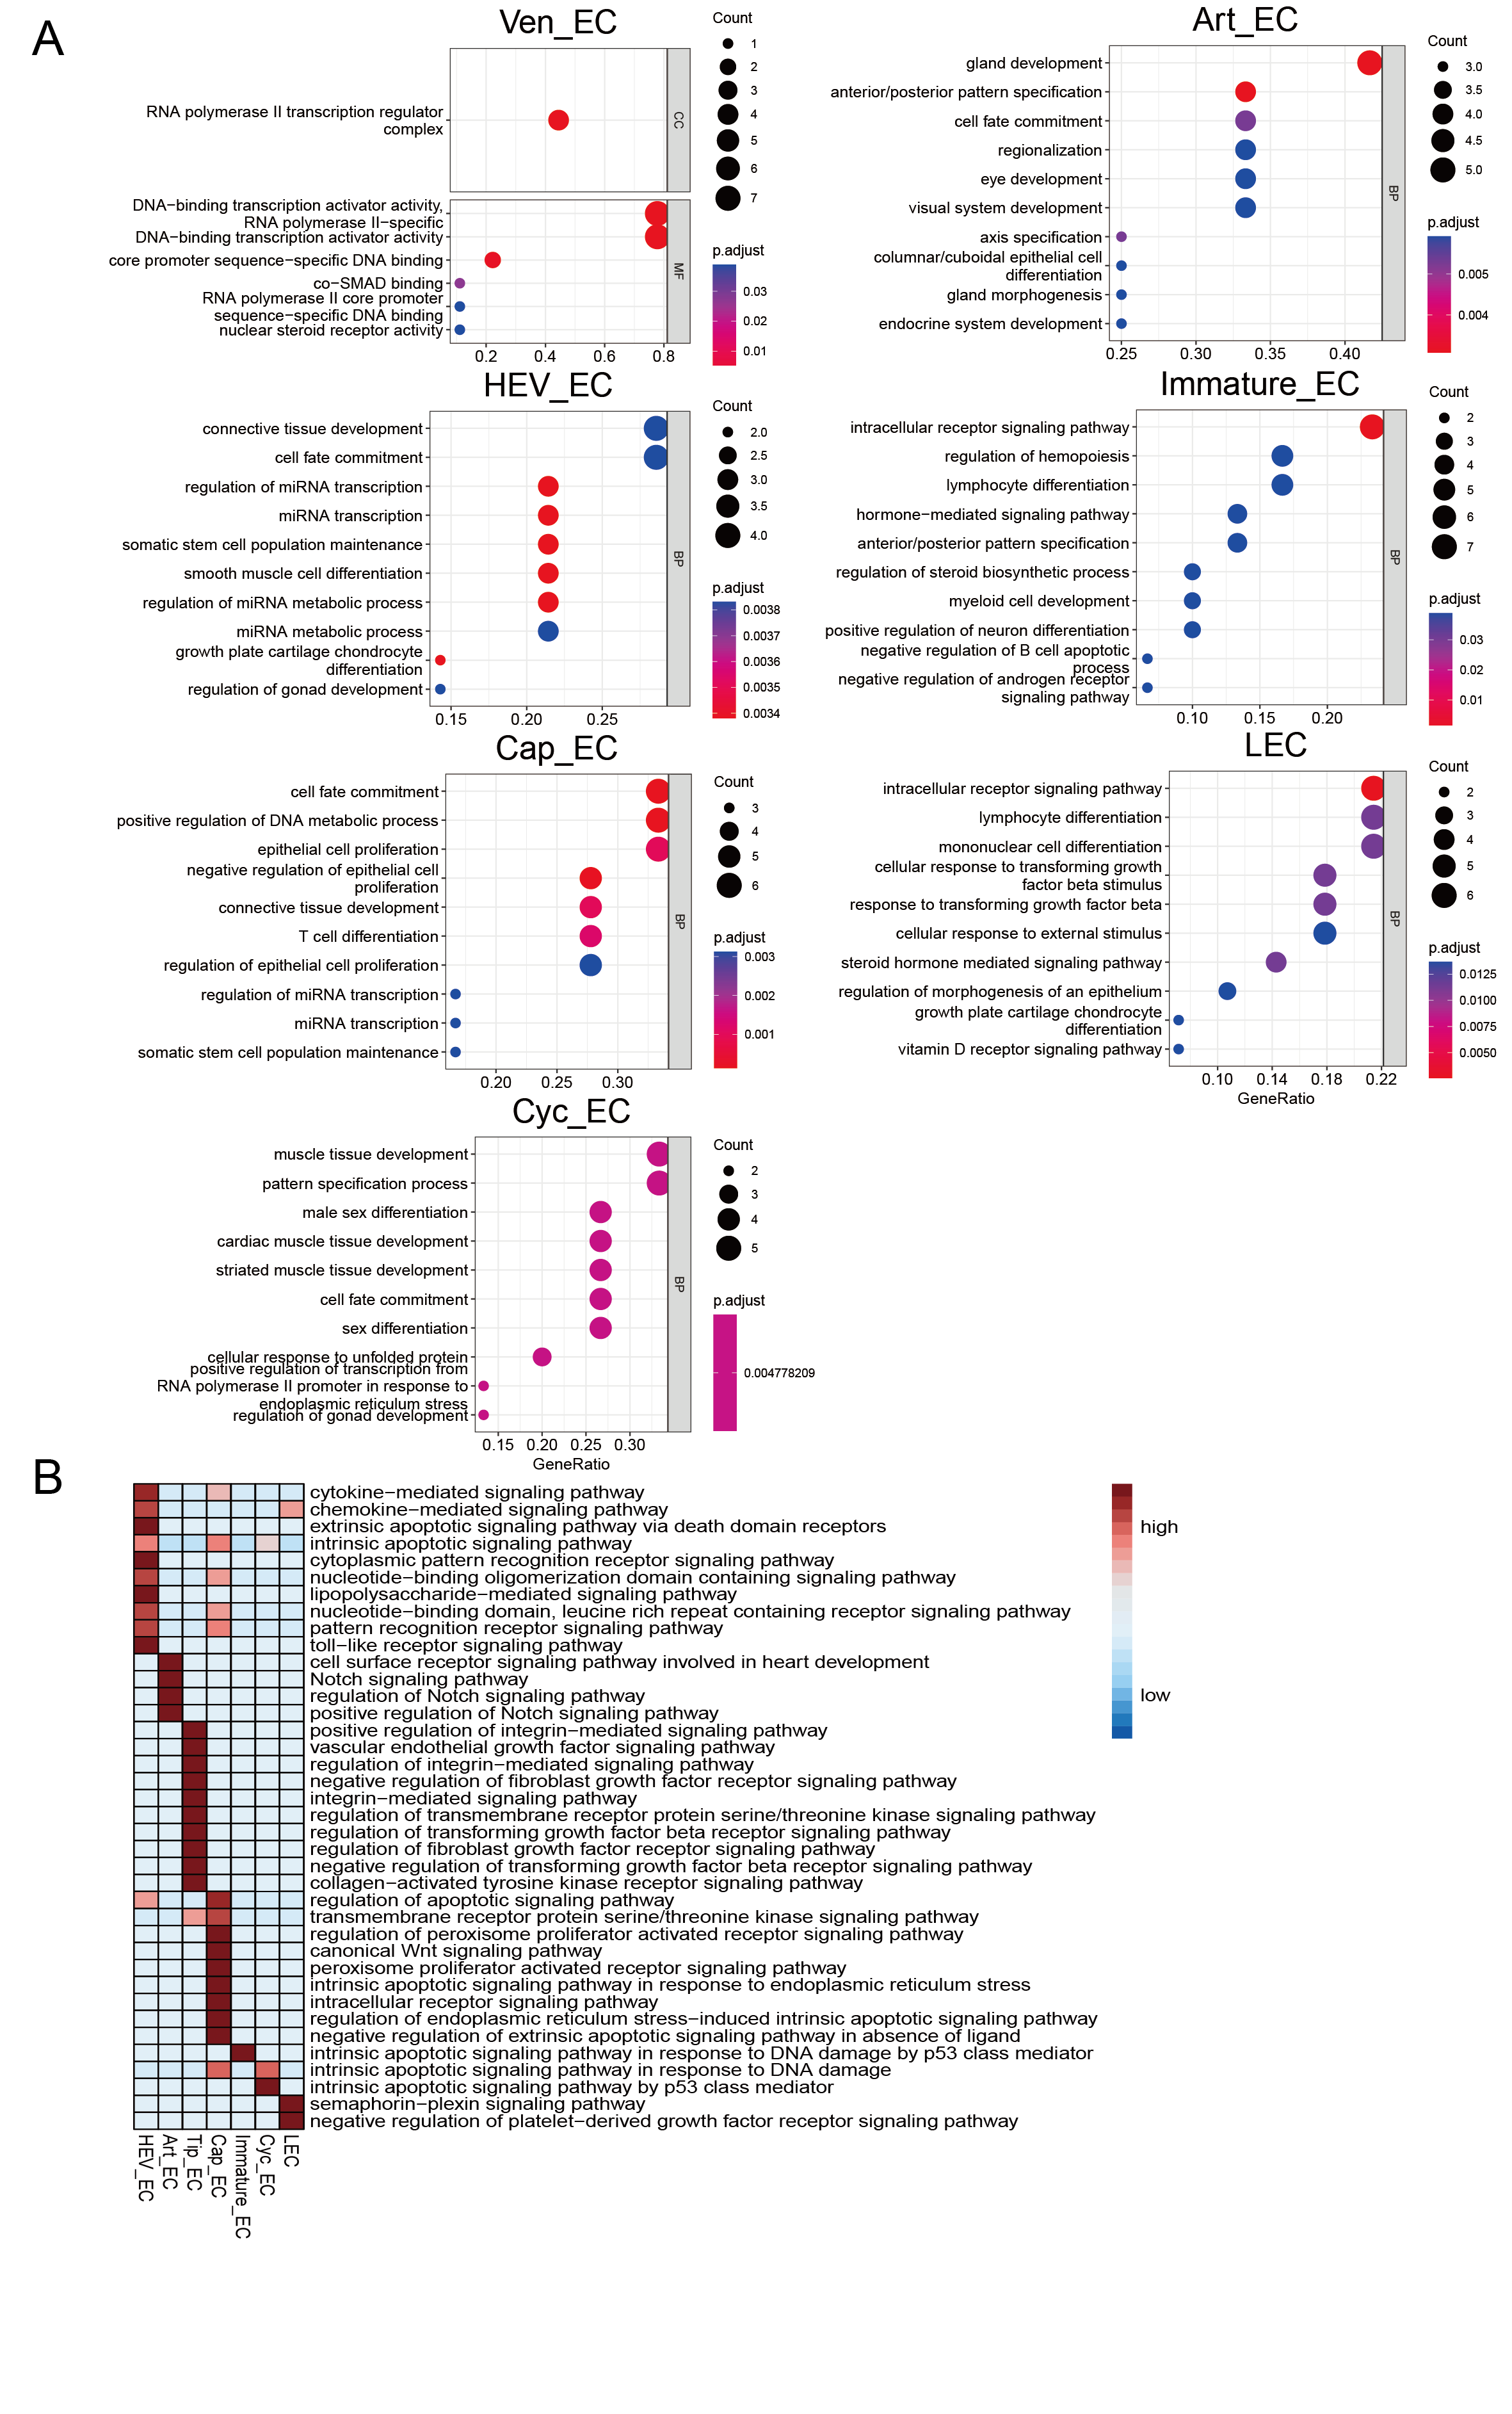
**

**Fig. S3|** GO analysis of EC subclusters. **A,** Top 10 functions enriched in each subcluster except Tip cells (shown in the main Fig. 2A). **B,** Signaling pathways enriched in each EC subcluster.


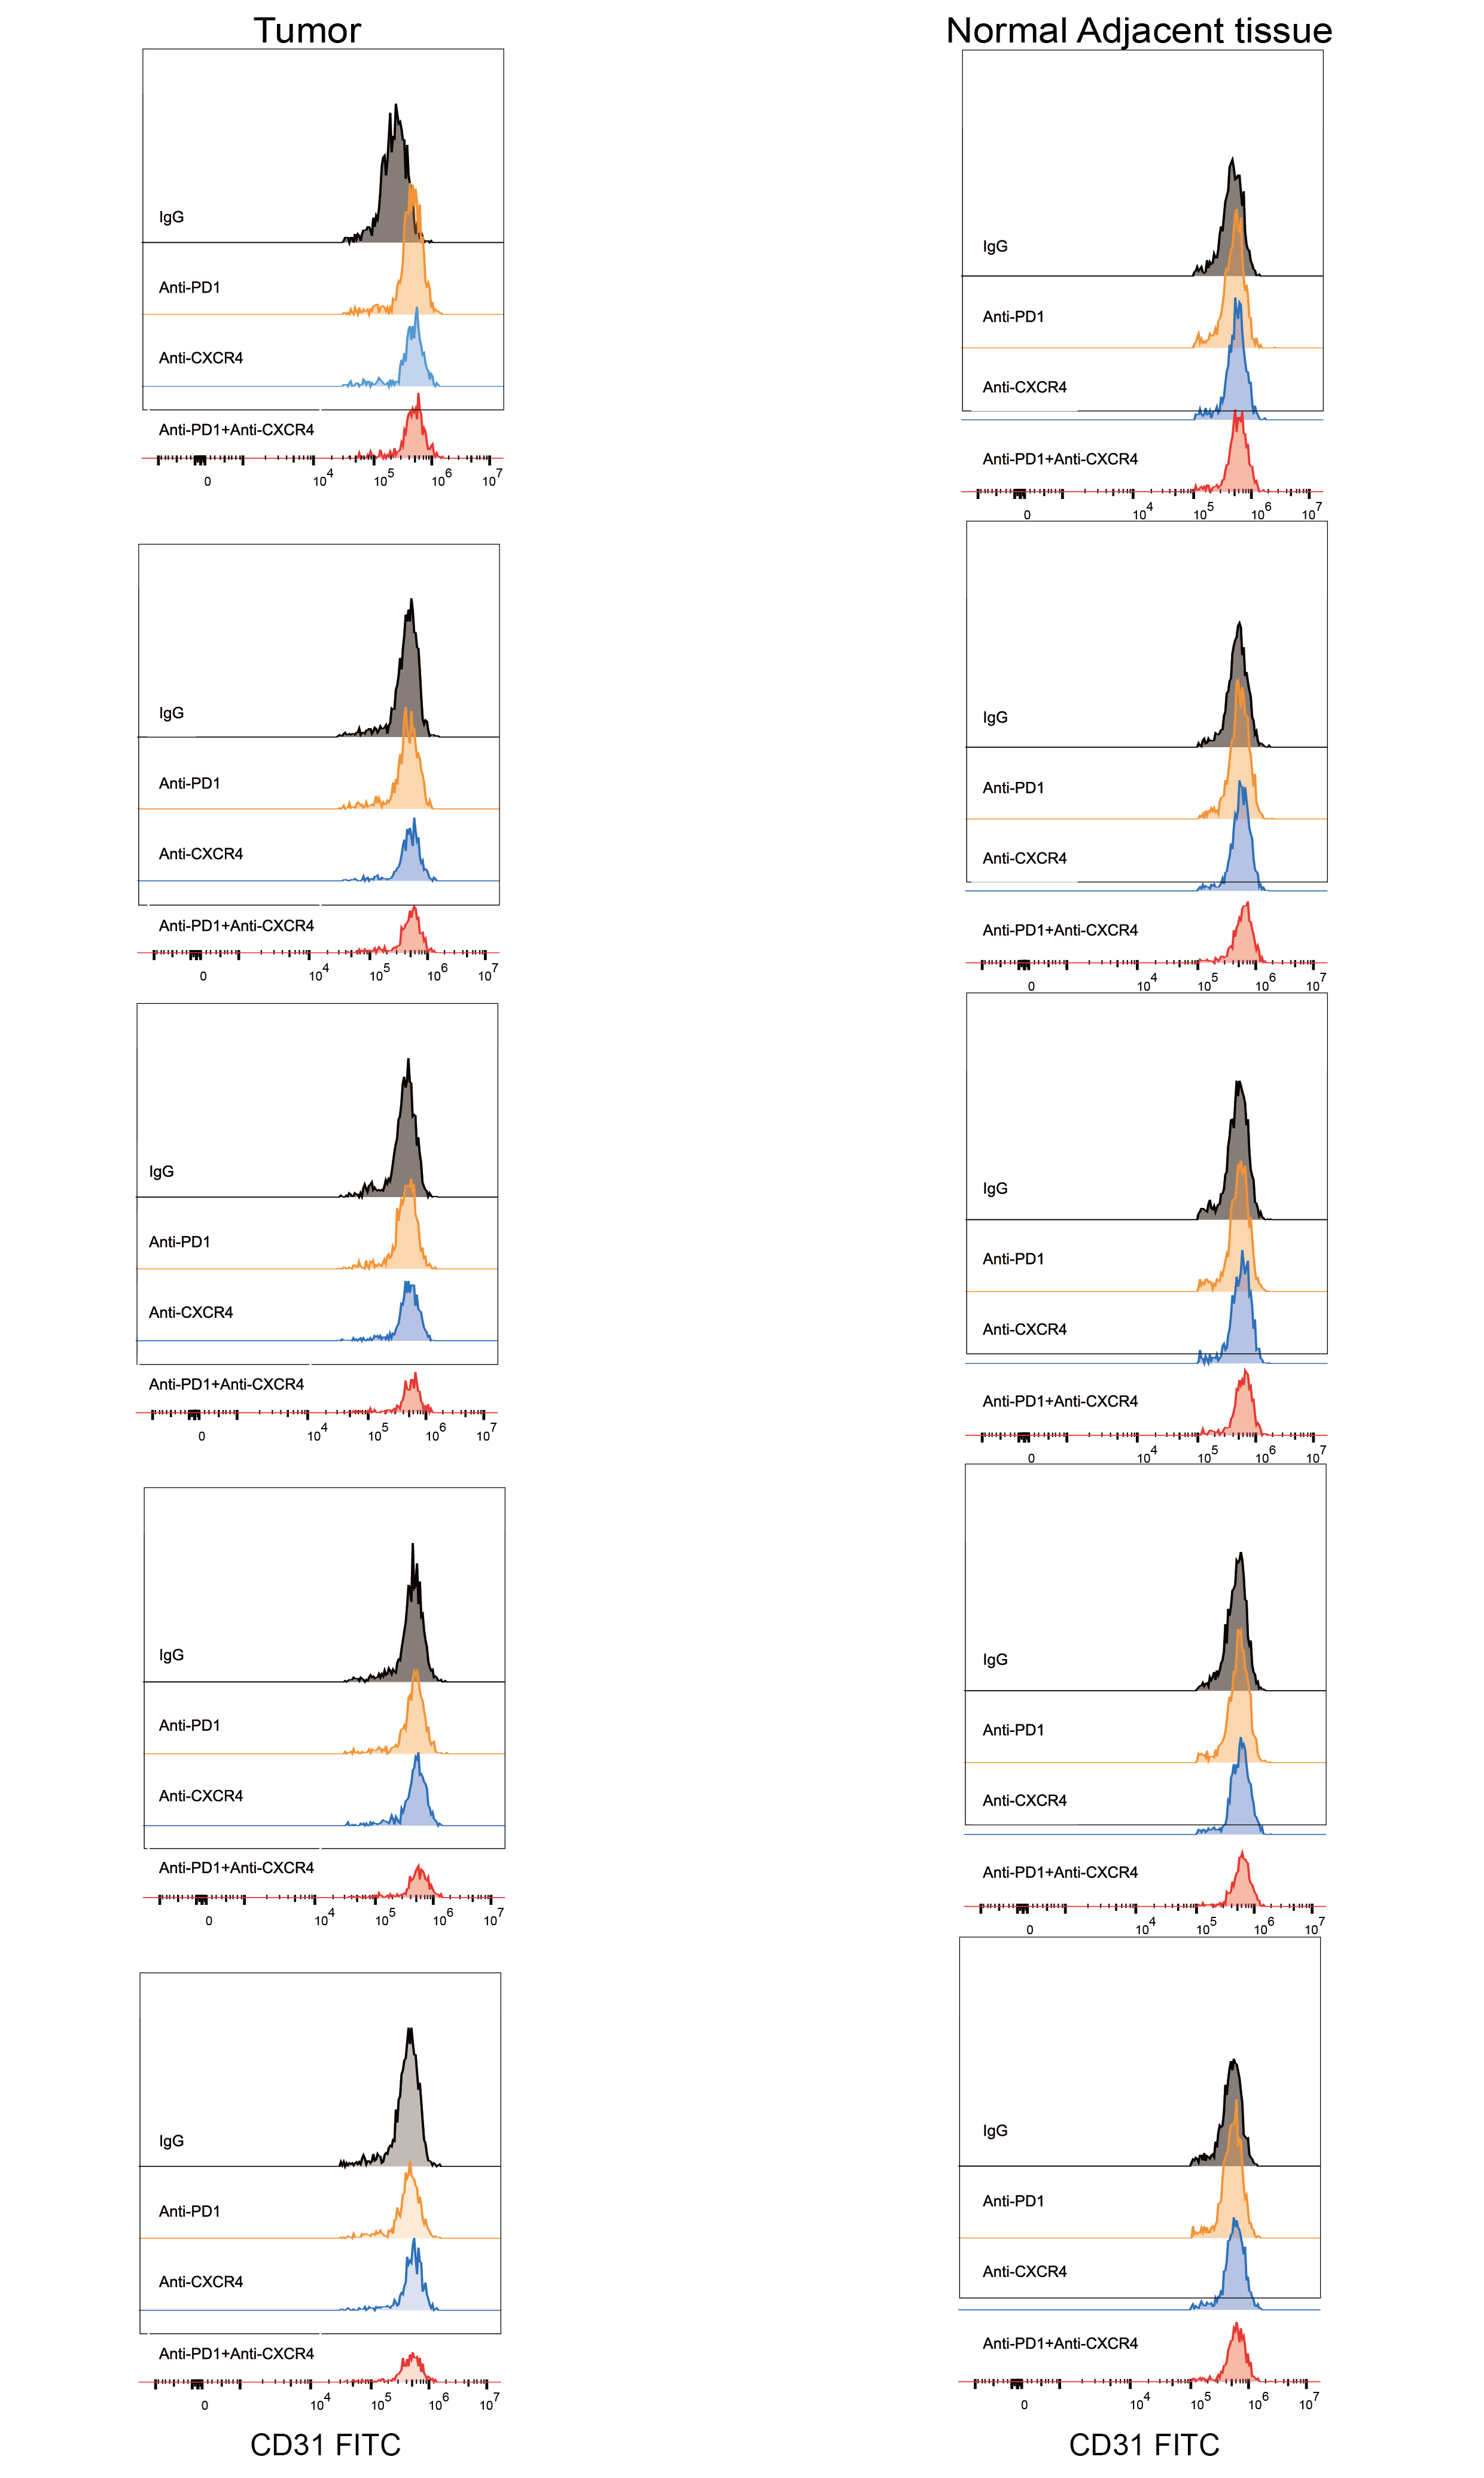


Fig.S4| Flow cytometry screening CD31+ cells in tissues from each group.
